# Supplementary material for: RNA localization mechanisms transcend cell morphology
Source: eLife. 2023 Mar 3;12:e80040. doi: 10.7554/eLife.80040 (PMC9984196; doi:10.7554/eLife.80040)
Supplement: Supplementary file 2. — Sequences of individual probes used as equimolar pool to visualize endogenous RNAs in fixed cells. Note that the last 28 nt of each probe correspond to the sequence that hybridize to the Cy3-labeled secondary probe. [file elife-80040-supp2.xlsx]

## Sheet: Sheet1
Gene	Probe ID	Sequence
RPS28	RPS28_1	CACTAAGTGAGGCTGGGGCTGAATCCCTTACACTCGGACCTCGTCGACATGCATT
RPS28	RPS28_2	CTGCTCAGAGGCTAACACTGGCCGAATTACACTCGGACCTCGTCGACATGCATT
RPS28	RPS28_3	GAAAGGCAATTTCAGTTGGGGTGACTGTGGCTTACACTCGGACCTCGTCGACATGCATT
RPS28	RPS28_4	TTGGCAAGACCGCACGGCCAGGATTTTTACACTCGGACCTCGTCGACATGCATT
RPS28	RPS28_5	TATTTAAAGGAGCATCTCAGTTACGTGTGGCGTTACACTCGGACCTCGTCGACATGCATT
RPS28	RPS28_6	TCGGCCAAGTGGTCGAACCCGACATCTTACACTCGGACCTCGTCGACATGCATT
RPS28	RPS28_7	TGGACCATGCTAAGCTGTGATGTTTGGGATTACACTCGGACCTCGTCGACATGCATT
RPS28	RPS28_8	GATGTGGGAGGAAGGTCAAGCGCCTCTTTTACACTCGGACCTCGTCGACATGCATT
RPS28	RPS28_9	GTTTCCTGCCTCAAGGAGATTGCAGCATTACACTCGGACCTCGTCGACATGCATT
RPS28	RPS28_10	TTCAGTAAGCTGCCTCGTCTGGCTCATTACACTCGGACCTCGTCGACATGCATT
RPS28	RPS28_11	ACACCTAGCTGTGGGGAGATCTCCTCTTACACTCGGACCTCGTCGACATGCATT
RPS28	RPS28_12	GTCACCTCAGCCTTTGGCGCACAGAATTACACTCGGACCTCGTCGACATGCATT
RPS28	RPS28_13	CCTGATCCACCCACTCTCTGAAACTTTTACACTCGGACCTCGTCGACATGCATT
RPS28	RPS28_14	AGAGTGCGGAGGATCGGTGACCGCCTTTACACTCGGACCTCGTCGACATGCATT
RPS28	RPS28_15	GATGATGGATCGGCTCGTGTCGTCCATTTACACTCGGACCTCGTCGACATGCATT
RPS28	RPS28_16	CTTGGTGACCCTGGCCAGCTTGATAGTTACACTCGGACCTCGTCGACATGCATT
RPS28	RPS28_17	TAAAACAGGCTTCGTGTTAGACGAGTTTCCCCTTACACTCGGACCTCGTCGACATGCATT
RPS28	RPS28_18	CTACAGGCTAAGGCGTTCTGAACAAGCTTAATTACACTCGGACCTCGTCGACATGCATT
RPS28	RPS28_19	ACACATTTCAACTTGCAATACTTTCAACCTATTTACACTCGGACCTCGTCGACATGCATT
RPS28	RPS28_20	AGGTCAGAAGGGGCAGAGGTTGGATACAAACTTACACTCGGACCTCGTCGACATGCATT
RPS28	RPS28_21	CCCAGACAGCCACACCTGGTGAAGGATTACACTCGGACCTCGTCGACATGCATT
RPS28	RPS28_22	CCCCACCAAGGTGAGGTGGGGACCAATTACACTCGGACCTCGTCGACATGCATT
RPS28	RPS28_23	TGTTTGGGGTAGAGGGTGCAATCGACAAACACTTACACTCGGACCTCGTCGACATGCATT
RPS28	RPS28_24	TCGTATAACCCAGACAAGAACCTGAGTTAACTTTACACTCGGACCTCGTCGACATGCATT
RPS28	RPS28_25	CCGGGCTTCTCGCTCTGACTCCAAAATTACACTCGGACCTCGTCGACATGCATT
RPS28	RPS28_26	CCTCGCGCACGGGGCCTTTTACATTGTTACACTCGGACCTCGTCGACATGCATT
RPL7	RPL7_1	GGCTTAATTTTATCACACACCACACTTGCTTACACTCGGACCTCGTCGACATGCATT
RPL7	RPL7_2	CTCTGATTCTGATGACAAACGCCAATTTGGGTTACACTCGGACCTCGTCGACATGCATT
RPL7	RPL7_3	CTGCAGGTACATAGAAGTTGCCAGCTTTTCTTACACTCGGACCTCGTCGACATGCATT
RPL7	RPL7_4	CCCTGATTTTGCACGAAATGGGCTGTTGATTTACACTCGGACCTCGTCGACATGCATT
RPL7	RPL7_5	TGTTGCCAGCATCTCCACCTTCTACATTACACTCGGACCTCGTCGACATGCATT
RPL7	RPL7_6	ATGGGTGGTCTTTTTCTTCATTCCACCTCTTACACTCGGACCTCGTCGACATGCATT
RPL7	RPL7_7	TTCGCTTCTTATTGATTTTGCCATAACCACGTTACACTCGGACCTCGTCGACATGCATT
RPL7	RPL7_8	TAGTTCATTTACTGACTTCAGATTGGGGTACCTTACACTCGGACCTCGTCGACATGCATT
RPL7	RPL7_9	TTCGAACCTTTGGGCTCACTCCATTGATTTACACTCGGACCTCGTCGACATGCATT
RPL7	RPL7_10	GTACATCTGCCTATATTCCTTGTGATAGTGTTACACTCGGACCTCGTCGACATGCATT
RPL7	RPL7_11	TTGCTTTTTCATAGATAAGCTTCCTCCTTGCTTACACTCGGACCTCGTCGACATGCATT
RPL7	RPL7_12	TTCGAAGCATCTTTTGGGCAAACTTCTTTCTCTTACACTCGGACCTCGTCGACATGCATT
RPL7	RPL7_13	GCGCTTGATCTTCAGCTCTGCGAAATTCTTACACTCGGACCTCGTCGACATGCATT
RPL7	RPL7_14	TCGCTTTTTCTTAAGGGTTTCTGGCACAGCTTACACTCGGACCTCGTCGACATGCATT
RPL7	RPL7_15	TTACATGGCAGTTTATAAACAAGCGAAGGCCCTTACACTCGGACCTCGTCGACATGCATT
RPL7	RPL7_16	TCCATAAACCAAAGTTGGATTACCTTACCGACTTACACTCGGACCTCGTCGACATGCATT
RPL7	RPL7_17	ATCATGTACAAATGCTTGTGAAACAGGCTTTCTTACACTCGGACCTCGTCGACATGCATT
RPL7	RPL7_18	AGAATAAACCCATTTCGAATCACTCAGCACATTACACTCGGACCTCGTCGACATGCATT
RPL7	RPL7_19	AGTTAAGGGAAGACAGAGGCAGGCTAACAACATTACACTCGGACCTCGTCGACATGCATT
RPL7	RPL7_20	TGAGAGCAGGTACTGTTTATTAACCAACCAGCTTACACTCGGACCTCGTCGACATGCATT
RPL7	RPL7_21	GTAGACACCTTAGTTCATTCTTCTAATAAGCCTTACACTCGGACCTCGTCGACATGCATT
RPL7	RPL7_22	ACAATTTGAAGGGCCACAGGAAGTTATTTGCCTTACACTCGGACCTCGTCGACATGCATT
RPL7	RPL7_23	GCGTTTTCCAACAGTATAGATCTCATGAATCATTACACTCGGACCTCGTCGACATGCATT
RPL7	RPL7_24	TCCTCCATGCAGATGATGCCGTATTTACTTACACTCGGACCTCGTCGACATGCATT
RPL7	RPL7_25	GATCGAGCAATCAAAGCGTTATCTGTCAAAGCTTACACTCGGACCTCGTCGACATGCATT
RPL7	RPL7_26	CATGCAATATATGGCTCTACAATCCTCAGTTACACTCGGACCTCGTCGACATGCATT
RPL7	RPL7_27	AATCGAAGCCTTGTTGAGCTTCACAAAGGTTCTTACACTCGGACCTCGTCGACATGCATT
RPL7	RPL7_28	AAGATTTGACGAAGGCGAAGAAGCTGCAACACTTACACTCGGACCTCGTCGACATGCATT
RPL7	RPL7_29	GCCATCCTCGCCATTCGAATTTCAGTTTTACACTCGGACCTCGTCGACATGCATT
RPL7	RPL7_30	GAACCTCCTTCTTCTTCTCTTCTACACTTACACTCGGACCTCGTCGACATGCATT
RPL7	RPL7_31	AAAAACCCAAGAGATGTCTTTCACACAGACTCTTACACTCGGACCTCGTCGACATGCATT
COL12A1	Col12a1_1	AAGTAATTGCAATGGAGTTGACGTTTCCCTCCTTACACTCGGACCTCGTCGACATGCATT
COL12A1	Col12a1_2	ATACACAGCAGCTCTGGGTTCCAGGATTACACTCGGACCTCGTCGACATGCATT
COL12A1	Col12a1_3	GGTGGGTGAGGAACACCAGTGACTACAGCTTACACTCGGACCTCGTCGACATGCATT
COL12A1	Col12a1_4	GTGTTATTCCGGCATAGAGCAAGCGGCATTACACTCGGACCTCGTCGACATGCATT
COL12A1	Col12a1_5	GTGGTGAGATTTCCATACAGACTCATTTCCTTTACACTCGGACCTCGTCGACATGCATT
COL12A1	Col12a1_6	AATCGTGTATGAAGGAGGGAGTCCATTTGGGTTTACACTCGGACCTCGTCGACATGCATT
COL12A1	Col12a1_7	AACACCTTAGGGACATTCTTCCTCATGCTTACACTCGGACCTCGTCGACATGCATT
COL12A1	Col12a1_8	GCAGGACTGATTTCATCAAAGCCTCCCTTACACTCGGACCTCGTCGACATGCATT
COL12A1	Col12a1_9	AGATGTGTATGTTCTGAGGAGGAAGGAGTCCCTTACACTCGGACCTCGTCGACATGCATT
COL12A1	Col12a1_10	GAATAGATGATCCTGTACTGCTGAACTGGCTTACACTCGGACCTCGTCGACATGCATT
COL12A1	Col12a1_11	ACCTGCTGCTGGTGCATAGAAGAGCTTTACACTCGGACCTCGTCGACATGCATT
COL12A1	Col12a1_12	CCAGCGGACATTCAAGGTGCTGGTAGAAGTTACACTCGGACCTCGTCGACATGCATT
COL12A1	Col12a1_13	CACTTAACAGTCAGGCTGTTAGATGTTGCATTTTACACTCGGACCTCGTCGACATGCATT
COL12A1	Col12a1_14	ACTGCCAATCAGGTCATCACTTTCTGACTTACACTCGGACCTCGTCGACATGCATT
COL12A1	Col12a1_15	CCCAAGTCCCTCTGAAACCCTCTGATTTACACTCGGACCTCGTCGACATGCATT
COL12A1	Col12a1_16	CTGACTGTGTACAAGGTCTGTGAGAAGAGGTCTTACACTCGGACCTCGTCGACATGCATT
COL12A1	Col12a1_17	ACTGTCAGAAGGTGGTGTCCAGCTCACTTACACTCGGACCTCGTCGACATGCATT
COL12A1	Col12a1_18	GGGTATCATCAGGATCAGTTGCAATCATCTTTACACTCGGACCTCGTCGACATGCATT
COL12A1	Col12a1_19	GAGCAAGAGCAATTTGTACTCTTTTGGGGCCTTACACTCGGACCTCGTCGACATGCATT
COL12A1	Col12a1_20	CTCTGGTGAGACACTCCATCCCAGAAGTTACACTCGGACCTCGTCGACATGCATT
COL12A1	Col12a1_21	TGGCATAACAGTTGTGTCGGAAAGGGTTGTCATTACACTCGGACCTCGTCGACATGCATT
COL12A1	Col12a1_22	AGGAAGAACTGTGATGTCATATGTGGTCTGTGTTACACTCGGACCTCGTCGACATGCATT
COL12A1	Col12a1_23	TGAAGTCGCTTTAACACTGTCGAAGTGACTGTTTACACTCGGACCTCGTCGACATGCATT
COL12A1	Col12a1_24	GGAATCTTGAGATAATTCAGTTGTGGCATCTCTTACACTCGGACCTCGTCGACATGCATT
COL12A1	Col12a1_25	TTCCATGAGACCCTGTAACCGCGAACCTTACACTCGGACCTCGTCGACATGCATT
COL12A1	Col12a1_26	TCCTGGAGCAGATGTCCAATAAGCCCTTACACTCGGACCTCGTCGACATGCATT
COL12A1	Col12a1_27	ATCTTGAGGAGAACCACGTTCTTCAAGTGTTGTTACACTCGGACCTCGTCGACATGCATT
COL12A1	Col12a1_28	CCAAATACAAGGTCTCTGGCTTCAGGCTTTACACTCGGACCTCGTCGACATGCATT
COL12A1	Col12a1_29	TGAGAACAACACTGGTGCTCGATGCTGGTTACACTCGGACCTCGTCGACATGCATT
COL12A1	Col12a1_30	GTGAACACATGGGTCTCTGCAGGAGGAGATTACACTCGGACCTCGTCGACATGCATT
COL12A1	Col12a1_31	ATTCCTCAGTTTTATCGCAGGATCTCTGAAAGTTACACTCGGACCTCGTCGACATGCATT
COL12A1	Col12a1_32	GGCTTTTATATCCACACCACGTGAGCATTTACACTCGGACCTCGTCGACATGCATT
COL12A1	Col12a1_33	CATGGCGGAAACACTGATCTGGTATTCTGTTTACACTCGGACCTCGTCGACATGCATT
COL12A1	Col12a1_34	GTTGTTCATCAACACCTGAGCACACCTGTTACACTCGGACCTCGTCGACATGCATT
COL12A1	Col12a1_35	ATTACGAAGCTCTCTTGCTGGAATTTCCACTTACACTCGGACCTCGTCGACATGCATT
COL12A1	Col12a1_36	ACAATTGGATCAACTGGTTTTGCCCATGACTTACACTCGGACCTCGTCGACATGCATT
COL12A1	Col12a1_37	AATGTCTACAGACTGCGTGCTTGGAGCTTTACACTCGGACCTCGTCGACATGCATT
COL12A1	Col12a1_38	CTCGTCTGCGCCGTAGTCCTCGTATTTTACACTCGGACCTCGTCGACATGCATT
COL12A1	Col12a1_39	CGCGGTGATGGCACTCCAGTCTTAATCTTACACTCGGACCTCGTCGACATGCATT
COL12A1	Col12a1_40	TGTGATGTCGACCCGGTTCGTTAACCATTATTTACACTCGGACCTCGTCGACATGCATT
COL12A1	Col12a1_41	TGCCCGTTGTATGGGATGCTGGCACATTACACTCGGACCTCGTCGACATGCATT
COL12A1	Col12a1_42	GTCCTCGGATACCTGAGTTTCCAGGACGTTACACTCGGACCTCGTCGACATGCATT
COL12A1	Col12a1_43	CTGGTGGACCTGTTCTGGATTCTCCTTTTACACTCGGACCTCGTCGACATGCATT
COL12A1	Col12a1_44	CTTTCACCTTTCTCTCCTGGCAAACCTTTACACTCGGACCTCGTCGACATGCATT
COL12A1	Col12a1_45	TCTTGCAACTGCTCGCATCATGTTCTGTTACACTCGGACCTCGTCGACATGCATT
COL12A1	Col12a1_46	TGATCTCCAGGTTTTCCTGGCTTCCCTTACACTCGGACCTCGTCGACATGCATT
COL12A1	Col12a1_47	CCTGGGTCCCATTGCACCGTCTTTTCTTACACTCGGACCTCGTCGACATGCATT
COL12A1	Col12a1_48	TTGGTCCTGGTGGGCCAGGTAATCCTTTACACTCGGACCTCGTCGACATGCATT
SERPINF2	Serpinf2_1	CCAGGCTGTGCCAGACACGAGTTCCATTACACTCGGACCTCGTCGACATGCATT
SERPINF2	Serpinf2_2	AGCAGCTAACCTGTCTCCTGGCAGAATTACACTCGGACCTCGTCGACATGCATT
SERPINF2	Serpinf2_3	GGAAAGAATGGCCTCTCTCAGACTGCCTTACACTCGGACCTCGTCGACATGCATT
SERPINF2	Serpinf2_4	AGTCACATGAGTGGAGAGGCTGGTCCAGTTACACTCGGACCTCGTCGACATGCATT
SERPINF2	Serpinf2_5	GTTTCAGATACAGCTTAGGCAGCCGGACTTACACTCGGACCTCGTCGACATGCATT
SERPINF2	Serpinf2_6	CAACTCAGGTTGGCCAGTACCTGGGACTTACACTCGGACCTCGTCGACATGCATT
SERPINF2	Serpinf2_7	GTTCCATTCAAAGTGGGTGGGTACAAGGACCTTACACTCGGACCTCGTCGACATGCATT
SERPINF2	Serpinf2_8	CTGGATCTCAGGCTGCTCCAGCAAGATTACACTCGGACCTCGTCGACATGCATT
SERPINF2	Serpinf2_9	CACCGTGAACTGCTCGTCCAGGTGGAATTACACTCGGACCTCGTCGACATGCATT
SERPINF2	Serpinf2_10	GTTGAGGAGAAGCAACACGGTGTCTTCCGGTTACACTCGGACCTCGTCGACATGCATT
SERPINF2	Serpinf2_11	TGAGCACCTAGTGCCAGGTGAGACAGCTTACACTCGGACCTCGTCGACATGCATT
SERPINF2	Serpinf2_12	CTCCATGGCGCTCACAGGGGAGAACATTACACTCGGACCTCGTCGACATGCATT
SERPINF2	Serpinf2_13	ATCTTCTTGCCAAGAACAGGCTCCAGTTTTACACTCGGACCTCGTCGACATGCATT
SERPINF2	Serpinf2_14	CAGGCCCATTCATTCTTTATTCAGGTGGCTTACACTCGGACCTCGTCGACATGCATT
SERPINF2	Serpinf2_15	GATCTCGAGGAGCCGTGGGAAGTCTGGTTACACTCGGACCTCGTCGACATGCATT
SERPINF2	Serpinf2_16	GATGGACTCTCGGCAGGTTAGGCCACTTACACTCGGACCTCGTCGACATGCATT
SERPINF2	Serpinf2_17	CCTAGCCTAGGTGTCCCGGGACAAGTTTACACTCGGACCTCGTCGACATGCATT
SERPINF2	Serpinf2_18	GTGCAGGACACCCTCTGAGCCTGTTTTTACACTCGGACCTCGTCGACATGCATT
SERPINF2	Serpinf2_19	CACTTGGGGCTGCCAAACTGGGGGTATTACACTCGGACCTCGTCGACATGCATT
SERPINF2	Serpinf2_20	GGGAAGCCTTTCAGGCTCTGGAGGAAGTTTACACTCGGACCTCGTCGACATGCATT
SERPINF2	Serpinf2_21	TTGTTGCCCGGGGAATCCTGCTGTTCTTACACTCGGACCTCGTCGACATGCATT
SERPINF2	Serpinf2_22	CTCGCTGAGCTCCAGGGTGGACTGATTTACACTCGGACCTCGTCGACATGCATT
SERPINF2	Serpinf2_23	CTGAGGGTGGCCACCAGGTCCATTTGTTACACTCGGACCTCGTCGACATGCATT
SERPINF2	Serpinf2_24	CGGGTACGTGCGGGCCTGCATCATTTTTACACTCGGACCTCGTCGACATGCATT
SERPINF2	Serpinf2_25	AGTCTCTCTGGGTAAGGCTCGGGTCAAATTACACTCGGACCTCGTCGACATGCATT
SERPINF2	Serpinf2_26	TGTTCCTCCAGAAACCCTGGAAGTGGATGTTACACTCGGACCTCGTCGACATGCATT
SERPINF2	Serpinf2_27	TTTGCCAGGTCATCTTCCTGCTTTCCTTACACTCGGACCTCGTCGACATGCATT
SERPINF2	Serpinf2_28	TCGGATTGTTCCAGGAAATCTTCTTTGATGGGTTACACTCGGACCTCGTCGACATGCATT
SERPINF2	Serpinf2_29	ATCCTTTCTGCAGGTACATCCTGGCATTACACTCGGACCTCGTCGACATGCATT
SERPINF2	Serpinf2_30	CTGTTGCAGCCTCTGCAACGTGTGGTTTACACTCGGACCTCGTCGACATGCATT
SERPINF2	Serpinf2_31	AGGTTGGGGCAGGTGGACGTTTGAGCCATTACACTCGGACCTCGTCGACATGCATT
SERPINF2	Serpinf2_32	CTGCAGACTCCTGGGGGACTCTTCAGTTACACTCGGACCTCGTCGACATGCATT
SERPINF2	Serpinf2_33	CAGGCTCCTGGTTGCCCAACTTGAGGTTACACTCGGACCTCGTCGACATGCATT
SERPINF2	Serpinf2_34	GGTAAGTGGGGACACCTGCTCCTGGTTTACACTCGGACCTCGTCGACATGCATT
SERPINF2	Serpinf2_35	GAGCAGCGCCATGTTCCTGGGCATTATTACACTCGGACCTCGTCGACATGCATT
SERPINF2	Serpinf2_36	GGAGAGGAAGGAAGGGAAATGCTGGCAGTGTTTTACACTCGGACCTCGTCGACATGCATT
SERPINF2	Serpinf2_37	TGACAAGGCACAGGGGGTAGGATGGAGGTTACACTCGGACCTCGTCGACATGCATT
SERPINF2	Serpinf2_38	AAGAAAGATGAGGGTCAGGCTCCCGGCTTACACTCGGACCTCGTCGACATGCATT
SERPINF2	Serpinf2_39	CCTCCTCCATGGGGGGCACAAGTTTTTTACACTCGGACCTCGTCGACATGCATT
SERPINF2	Serpinf2_40	TGTCCTCGAAGATGAAGAAGAGGAAGGGGCGTTACACTCGGACCTCGTCGACATGCATT
SERPINF2	Serpinf2_41	TCACGCTGAAGGAGGACAGGGACATGCTTACACTCGGACCTCGTCGACATGCATT
SERPINF2	Serpinf2_42	AGCTCATGTTGTTCTTAAAGGGGAAATGAGCCTTACACTCGGACCTCGTCGACATGCATT
SERPINF2	Serpinf2_43	CGTGGCCTCCTTCACCCATTGGTTGATTACACTCGGACCTCGTCGACATGCATT
SERPINF2	Serpinf2_44	AGGGAGAACAGGTCGGCAGTGAAGGCCATTACACTCGGACCTCGTCGACATGCATT
